# Supplementary material
Source: HighWire-hosted journal article supplement (https://erj.ersjournals.com/content/57/3/2100051)
Supplement: inline-supplementary-material-1 [file inline-supplementary-material-1.pdf]

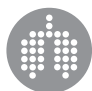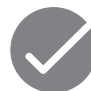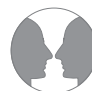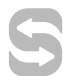

SHAREABLE PDF

# Examining the intubation decision in randomised clinical trials

Aiman Tulaimat 

**Affiliation:** The Division of Pulmonary, Critical Care and Sleep Medicine, Cook County Health, Chicago, IL, USA.

**Correspondence:** Aiman Tulaimat, The Division of Pulmonary, Critical Care and Sleep Medicine, Cook County Health, 1950 West Polk Street, Room 8205, Chicago, IL, USA. E-mail: [atulaimat@cookcountyhhs.org](mailto:atulaimat@cookcountyhhs.org)

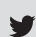

@ERSpublications

**Criteria used in clinical trials to identify patients with respiratory failure and for when to intubate them might not be applicable to clinical practice** <https://bit.ly/3qAmCYt>

**Cite this article as:** Tulaimat A. Examining the intubation decision in randomised clinical trials. *Eur Respir J* 2021; 57: 2100051 [<https://doi.org/10.1183/13993003.00051-2021>].

This single-page version can be shared freely online.

*To the Editor:*

TOBIN *et al.* [1] pointed in their editorial to the limitations of randomised trials in determining the effect of noninvasive modalities on the intubation of patients with respiratory failure. My colleagues and I have recently examined many design aspects of 53 randomised trials that evaluated the effect of noninvasive ventilation and high flow oxygen therapy on the outcomes of patients with acute respiratory failure [2]. Our findings support many of the points highlighted in the editorial.
